# Supplementary material
Source: PubMed Central journal article supplement (PMC5774221)
Supplement: NIHMS868650-supplement-1.pdf [file NIHMS868650-supplement-1.pdf]

**Co-infecting microbes dramatically alter pathogen gene essentiality during polymicrobial infection**

Supplementary Information

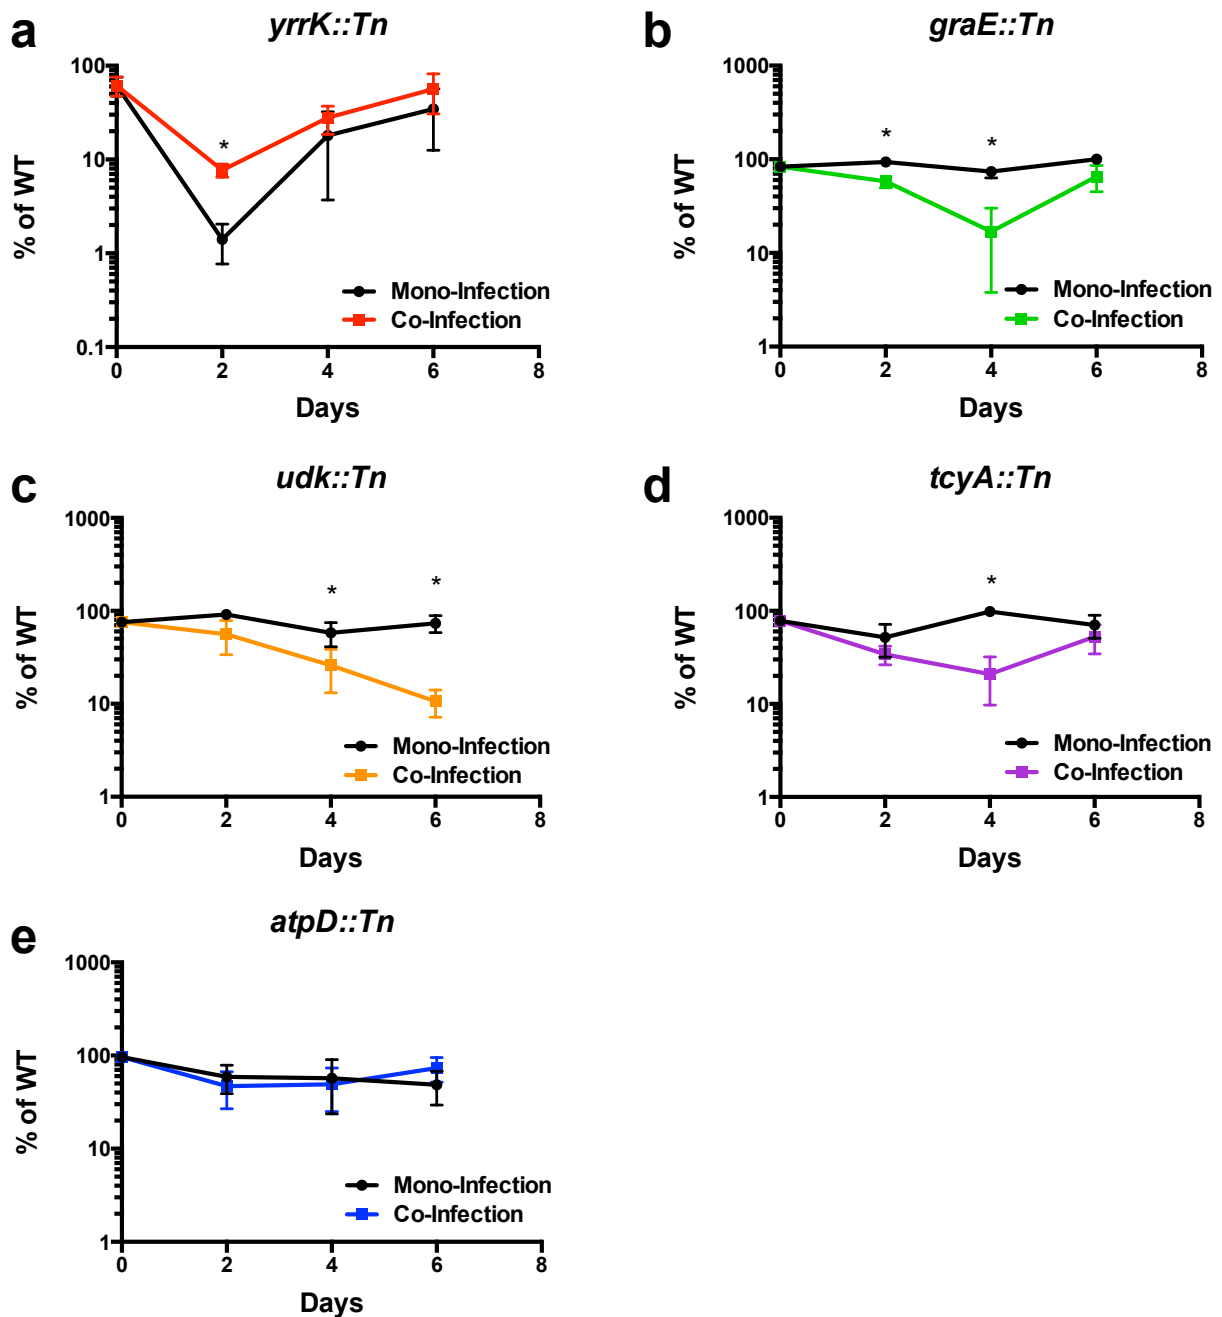

**Supplementary Figure 1. Some *S. aureus* CoDE genes are not *in vivo* specific.** Comparison of wildtype *S. aureus* and *S. aureus* CoDE gene mutant cell numbers in an *in vitro* chronic wound model during mono-culture and *P. aeruginosa* co-culture. *graE::TnMariner* (b, green), *udk* (c, orange), and *tcyA::TnMariner* (d, purple) were predicted to be required in co-culture but not mono-culture, while *yrrK::TnMariner* (a, red) and *atpD::TnMariner* (e, blue) were predicted to be required in mono-infection but not in co-infection. All mutants are reported as % wildtype cell number (*S. aureus* HG003) in the same condition. Statistical analysis was performed by arcsine transforming the data prior to analysis with a Student's *t*-test (\* =  $p < 0.05$ ). For each condition, 4 biological replicates were used. Error bars represent the standard error of the mean (SEM).

***A. actinomycetemcomitans***  
**Mono-Infection**

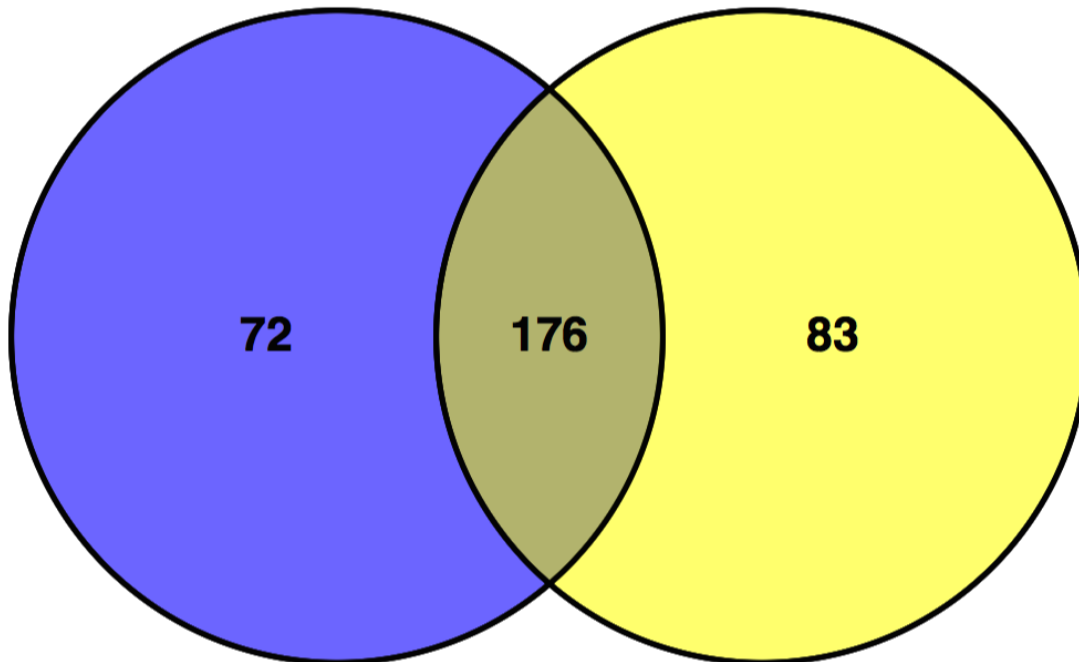

***A. actinomycetemcomitans***  
**Co-Infection**

**Supplementary Figure 2. Identification of CoDE genes in *A. actinomycetemcomitans* during co-infection with *S. gordonii*.** Venn diagram of the *A. actinomycetemcomitans in vivo* essential genome in mono-culture (blue, n=2) and co-culture (yellow, n=2) infection with *S. gordonii*. 72 CoDE genes were identified that were essential in mono-culture infection but non-essential in co-culture, and 83 CoDE genes were uniquely essential in co-infection. Data are the result of two replicates per condition.

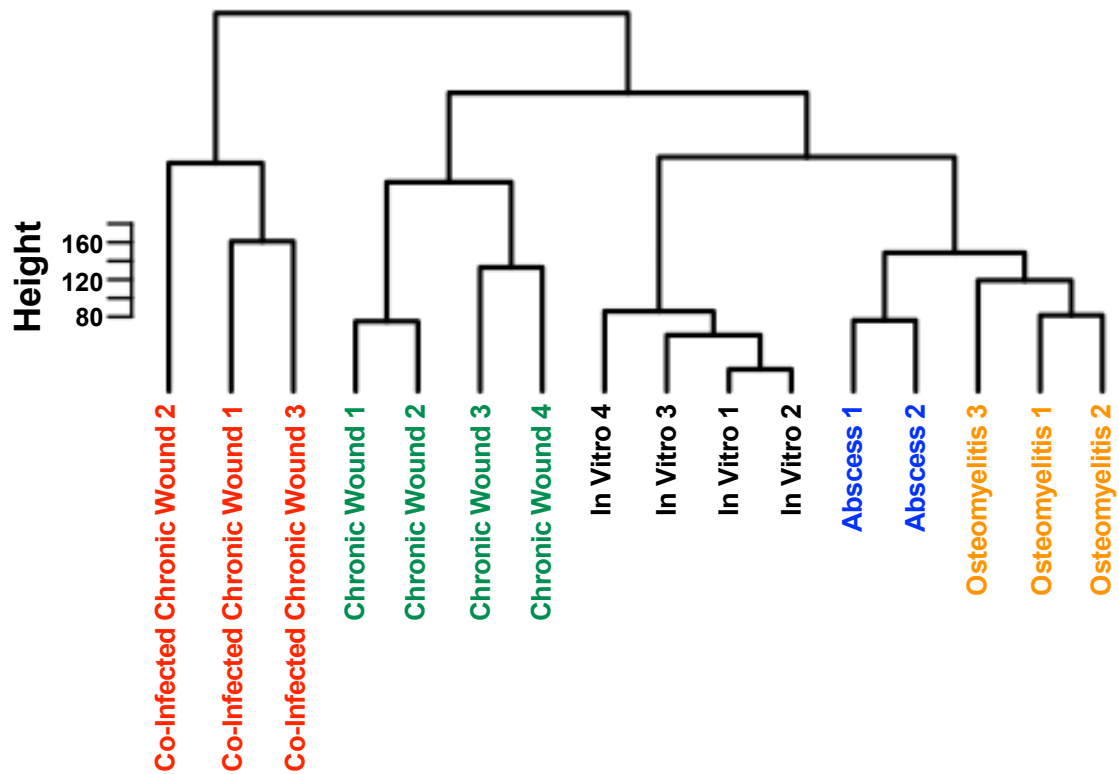

**Supplementary Figure 3. Experimental replicates cluster by condition.** Hierarchical clustering (Ward method) of the average normalized read counts per gene in each of the replicates (numbered and color coded) for all experimental conditions. Height indicates the Euclidean distance between clusters.

**Supplementary Table 1. The essential genes for *S. aureus* and *A. actinomycetemcomitans*.**

**Supplementary Table 2. Strains used in this study.**

| Strain or Plasmid                 | Description                                                                   | Source or Reference                  |
|-----------------------------------|-------------------------------------------------------------------------------|--------------------------------------|
| <i>S. aureus</i>                  |                                                                               |                                      |
| HG003 Tn Library                  | HG003 transposon library                                                      | Valentino <i>et al.</i> <sup>1</sup> |
| HG003                             | <i>S. aureus</i> wildtype strain derived from NCTC8325                        | Herbert <i>et al.</i> <sup>2</sup>   |
| CI46                              | JE2 SAUSA300_1573::ΦNΣ                                                        | Fey <i>et al.</i> <sup>3</sup>       |
| CI54                              | HG003 SAUSA300_1573::ΦNΣ                                                      | This work                            |
| CI58                              | JE2 SAUSA300_0113::ΦNΣ                                                        | Fey <i>et al.</i> <sup>3</sup>       |
| CI61                              | HG003 SAUSA300_0113::ΦNΣ                                                      | This work                            |
| CI59                              | JE2 SAUSA300_0773::ΦNΣ                                                        | Fey <i>et al.</i> <sup>3</sup>       |
| CI62                              | HG003 SAUSA300_0773::ΦNΣ                                                      | This work                            |
| CI67                              | JE2 SAUSA300_1455::ΦNΣ                                                        | Fey <i>et al.</i> <sup>3</sup>       |
| CI71                              | HG003 SAUSA300_1455::ΦNΣ                                                      | This work                            |
| CI66                              | JE2 SAUSA300_1568::ΦNΣ                                                        | Fey <i>et al.</i> <sup>3</sup>       |
| CI72                              | HG003 SAUSA300_1568::ΦNΣ                                                      | This work                            |
| CI68                              | JE2 SAUSA300_2359::ΦNΣ                                                        | Fey <i>et al.</i> <sup>3</sup>       |
| CI73                              | HG003 SAUSA300_2359::ΦNΣ                                                      | This work                            |
| CI69                              | JE2 SAUSA300_2058::ΦNΣ                                                        | Fey <i>et al.</i> <sup>3</sup>       |
| CI74                              | HG003 SAUSA300_2058::ΦNΣ                                                      | This work                            |
| <i>Other bacteria</i>             |                                                                               |                                      |
| PAO1 Tn Library                   | PAO1 transposon Library                                                       | Jacobs <i>et al.</i> <sup>4</sup>    |
| Aa624 Tn Library                  | High density transposon library in <i>A. actinomycetemcomitans</i> strain 624 | This work                            |
| <i>S. gordonii</i> Challis DL 1.1 | <i>Streptococcus gordonii</i> (ATCC <sup>®</sup> 49818)                       | ATCC                                 |

### Supplementary Table 3. Primers used in this study.

| Primer             | Sequence                                                                                   |
|--------------------|--------------------------------------------------------------------------------------------|
| olj376             | GTGACTGGAGTTCAGACGTGTGCTCTTCCGATCTGGGGGGGGGGGGGGGGGG                                       |
| PCR1-Ba-Bio        | TACAATAAGGATAAAATTTGAATGGTACCATAAACGACCG                                                   |
| PCR2-Ba            | AATGATACGGCGACCACCGAGATCTACACTCTTTCCCTACACGACGCTCTTCC<br>GATCTNNNNCGTCTAGAGACCGGGGACTTATCA |
| mariner-1          | ACTCACTATAGGAGGGCGGGAATCATTTGAAGGTTGGTAC                                                   |
| mariner-2          | AATGATACGGCGACCACCGAGATCTACACTCTTTCCCTACACGACGCTCTTCC<br>GATCTNNNNGTGTCAGACCGGGGACTTATCAG  |
| Barcoded<br>Primer | CAAGCAGAAGACGGCATAACGAGATXXXXXXXXGTGACTGGAGTTCAGACGTGTG                                    |
| Tnp-F-Sall         | TTAGTCGACATAAGGAGGCACTCACCATGGAA                                                           |
| Tnp-R-NotI         | TTAGCGGCCGCGAAAAATTCGTTTTTATTATTCAACATAGTTCCC                                              |
| KanR-UP-F          | CTACCAAGACGGAAGAGGATGAAGGATTGCCTTGAATATATTGACAA                                            |
| KanR-DN-R          | CCCCTTTTCATATATTATATAGTCAGTACTAAAAACAATTCATCCAGTA                                          |
| mar-UP-R           | CTTCATCCTCTTCGCTCTGGTAG                                                                    |
| mar-IR-NotI        | GCGGCCGCTAACAGGTTGGCTGATAAGTCCC                                                            |
| mar-DN-F           | GACTATATAATATATGAAAAGGGG                                                                   |
| CBI7               | CGACTATGAAGAACTTCCAACGC                                                                    |
| CBI8               | CCCATTCTTCATCAGTTTCGATTGG                                                                  |
| CBI9               | GCCTTTTACTTCTGAATAAAATCTTTC                                                                |
| CBI10              | GTTGCTCGTGCATTTAGATG                                                                       |
| CBI11              | GGGTGTAAGGTAGGTTGTTA                                                                       |
| CBI12              | CCACACCTGTTTAGAATGTGG                                                                      |
| CBI13              | GAGCATGTTTAATTGTAATTTTGATGGG                                                               |
| CBI14              | GCCACATTCTGTGCATGCTA                                                                       |
| CBI16              | GGGTCAATCGAGAATATCGTC                                                                      |
| CBI21              | GAGCGAATGACAAGGATTG                                                                        |
| CBI22              | CGTCCATATGAAGCATGTG                                                                        |
| CBI23              | GGTAACAGCTTAGACGCG                                                                         |
| CBI24              | CTCTACAACCTCAGGACGC                                                                        |
| CBI46              | GATGTTGCATGGTTATCACGCTGG                                                                   |
| CBI47              | GGTGCCAATGTCCATTGGTTGTC                                                                    |
| CBI48              | CGGAACAATATTAGACGCAAAGCAAGTG                                                               |
| CBI49              | CCACTCATGACACCTATCTCACCAG                                                                  |

\*xxxxxx= One of the 6 bp TruSeq barcode sequences, available at

**Supplementary Table 4. Sequencing data for each replicate in this study.**



**Supplementary Table 5. A list of all of the 'TA' dinucleotide positions in the *S. aureus* NCTC8325 reference genome.**

**Supplementary Table 6. A list of all of the 'TA' dinucleotide positions in the *A. actinomycetemcomitans* strain 624 reference genome.**

**Supplementary Table 7. Homologues in *S. aureus* strain NCTC8325 and *S. aureus* strain USA300\_FPR3757 for the transposon mutants used in this study.**

### Supplementary References:

- 1 Valentino, M. D. *et al.* Genes contributing to *Staphylococcus aureus* fitness in abscess- and infection-related ecologies. *MBio* **5**, e01729-01714, doi:10.1128/mBio.01729-14 (2014).
- 2 Herbert, S. *et al.* Repair of global regulators in *Staphylococcus aureus* 8325 and comparative analysis with other clinical isolates. *Infect Immun* **78**, 2877-2889, doi:10.1128/IAI.00088-10 (2010).
- 3 Fey, P. D. *et al.* A genetic resource for rapid and comprehensive phenotype screening of nonessential *Staphylococcus aureus* genes. *MBio* **4**, e00537-00512, doi:10.1128/mBio.00537-12 (2013).
- 4 Jacobs, M. A. *et al.* Comprehensive transposon mutant library of *Pseudomonas aeruginosa*. *Proceedings of the National Academy of Sciences of the United States of America* **100**, 14339-14344, doi:10.1073/pnas.2036282100 (2003).
